# Supplementary material for: Variants in autophagy genes MTMR12 and FAM134A are putative modifiers of the hepatic phenotype in α1-antitrypsin deficiency
Source: PubMed Central journal article supplement — Hepatology. 2024 Apr 1;80(4):859–71. doi: 10.1097/HEP.0000000000000865 (PMC11407773; doi:10.1097/hep.0000000000000865), 2024-04-01
Supplement: hep-80-859-s002.pdf [file hep-80-859-s002.pdf]

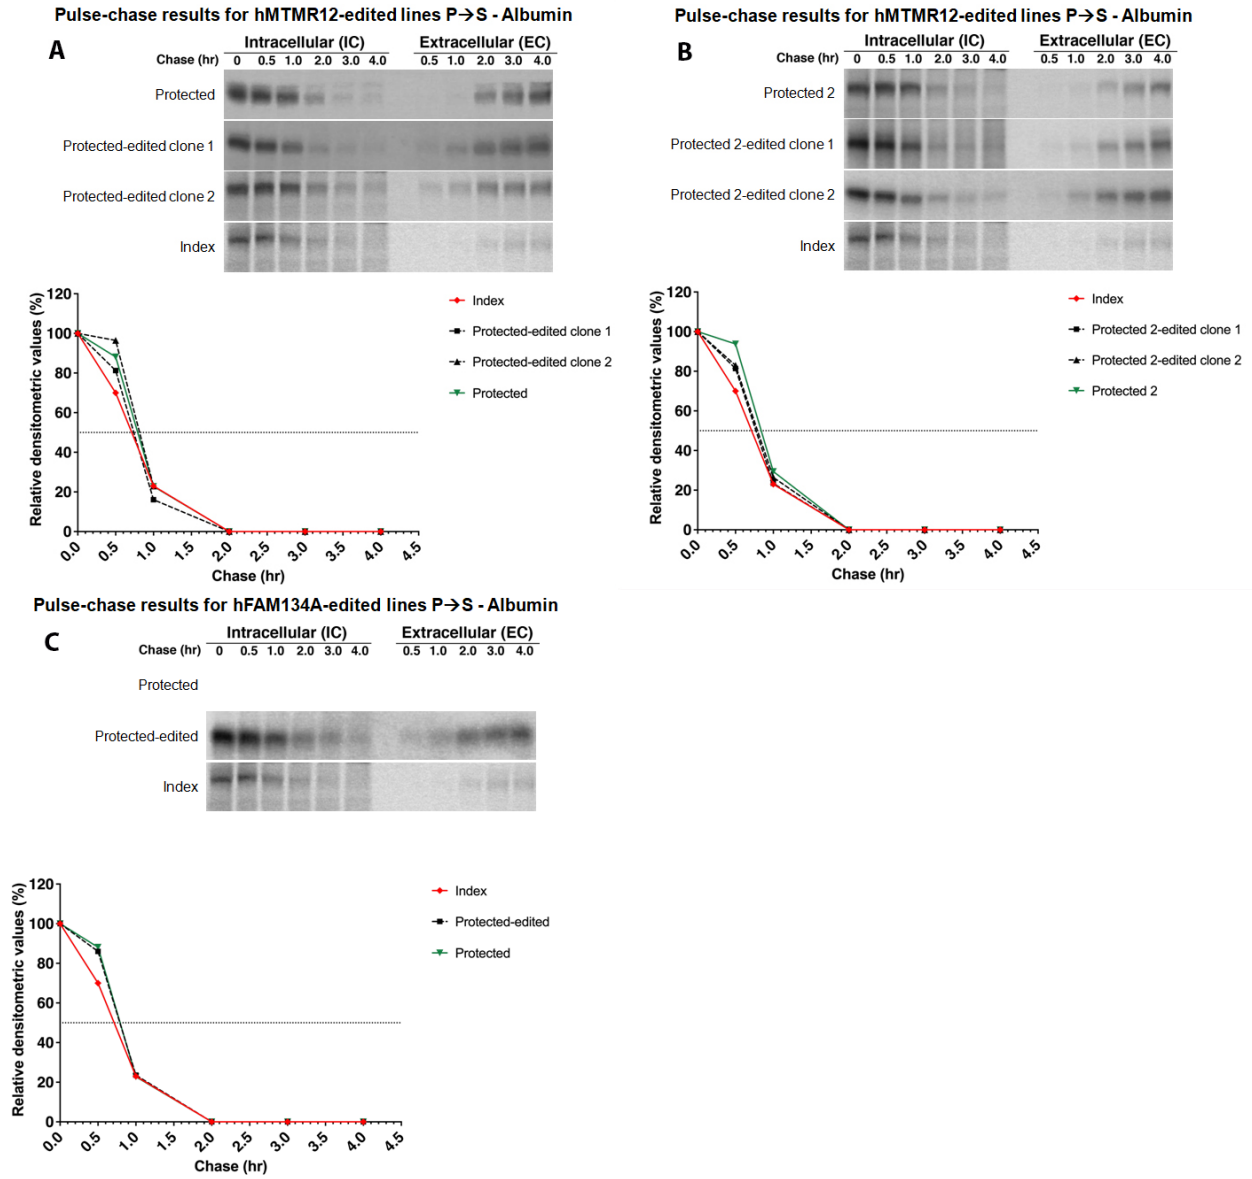

**Fig. S5.** Effect of introducing MTMR12 (A,B) and FAM134A (C) variants into iHeps from protected subjects on kinetics of albumin fate.

**Pulse-chase results for hMTMR12 and hFAM134A-edited lines P→S - Albumin**

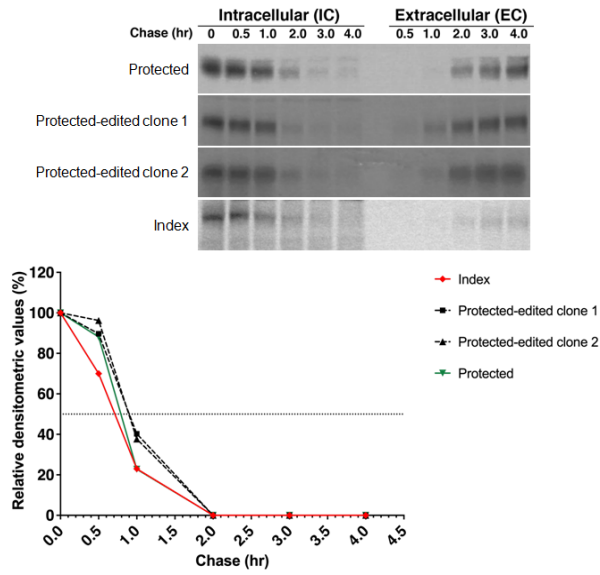

**Fig. S6.** Effect of introducing both MTMR12 and FAM134A variants into iHeps from protected subject on kinetics of albumin fate.

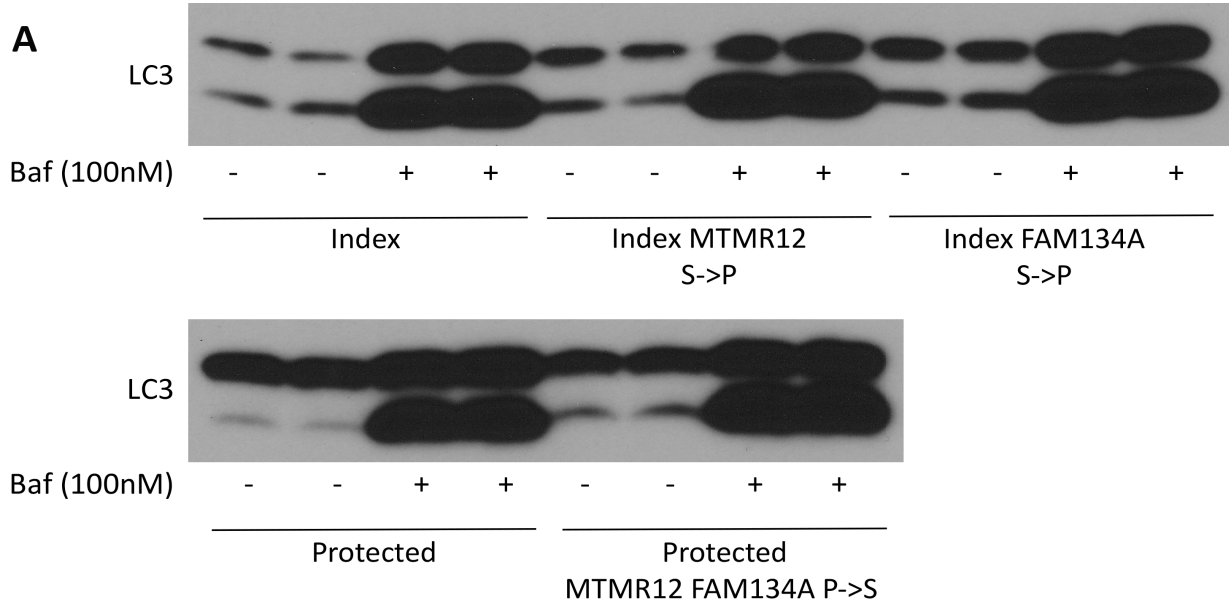

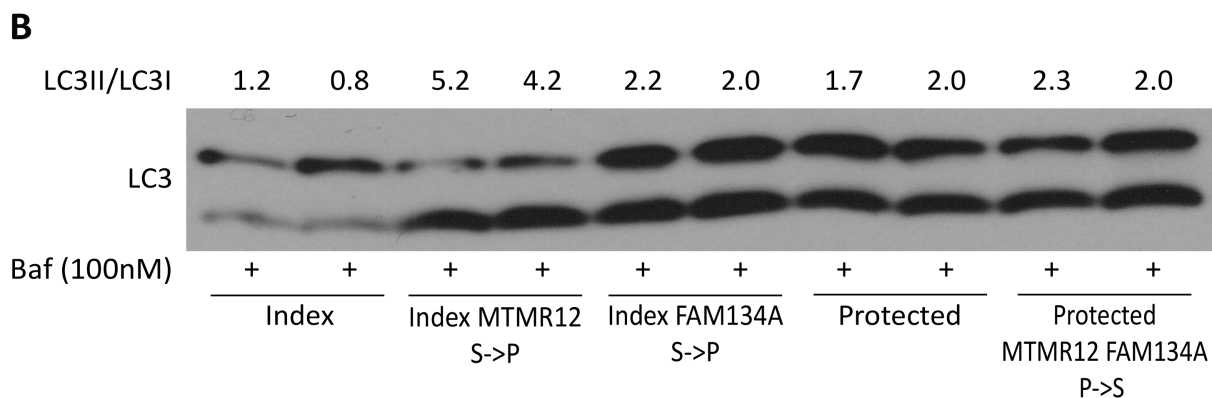

**Fig S7**

Effect of MTMR12 and FAM134A variants on autophagy flux in iHeps from index and protected subjects.

In **A** the results are shown for duplicate samples after 24 hours in the absence or presence of bafilomycin (100 nM). In **B** the samples treated with bafilomycin are compared to each other with densitometric analysis of LC3II to LC3I ratio shown at the top.

| ID         | Chr | Pos(hg38) | REF | ALT | Gene    | AA change                                                                                                                           | SIFT pred | Polyphen 2 HDIV pred | ExAc overall |
|------------|-----|-----------|-----|-----|---------|-------------------------------------------------------------------------------------------------------------------------------------|-----------|----------------------|--------------|
| H_UY-F3-F3 | 2   | 219182235 | A   | A   | FAM134A | .                                                                                                                                   | .         | .                    | .            |
| H_UY-F4-F4 | 2   | 219182235 | A   | A   | FAM134A | .                                                                                                                                   | .         | .                    | .            |
| H_UY-F5-F5 | 2   | 219182235 | A   | G   | FAM134A | FAM134A:NM_001321110:exon8:c.A617G:p.N206S,RETREG2:NM_001321109:exon9:c.A617G:p.N206S,RETREG2:NM_024293:exon9:c.A1238G:p.N413S      | D         | D                    | 0.0015       |
| H_UY-F3-F3 | 5   | 32229921  | G   | G   | MTMR12  | .                                                                                                                                   | .         | .                    | .            |
| H_UY-F4-F4 | 5   | 32229921  | G   | G   | MTMR12  | .                                                                                                                                   | .         | .                    | .            |
| H_UY-F5-F5 | 5   | 32229921  | G   | A   | MTMR12  | MTMR12:NM_001294344:exon14:c.C1771T:p.R591C,MTMR12:NM_001294343:exon15:c.C1939T:p.R647C,MTMR12:NM_001040446:exon16:c.C2101T:p.R701C | D         | D                    | 0.0016       |

**Table S1**

| ID         | Chr | Pos(hg38) | REF | ALT | Gene    | AA change                                                                                                                           | SIFT pred | Poly phen2 | ExAC overall | gnomAD _exome | gnomAD _genome | CADD_ phred | MetaSVM _pred |
|------------|-----|-----------|-----|-----|---------|-------------------------------------------------------------------------------------------------------------------------------------|-----------|------------|--------------|---------------|----------------|-------------|---------------|
| H_UY-F5-F5 | 2   | 219182235 | A   | G   | FAM134A | FAM134A:NM_001321110:exon8:c.A617G:p.N206S,RETREG2:NM_001321109:exon9:c.A617G:p.N206S,RETREG2:NM_024293:exon9:c.A1238G:p.N413S      | D         | D          | 0.0015       | 0.0018        | 0.0021         | 23.7        | T             |
| H_UY-F5-F5 | 5   | 32229921  | G   | A   | MTMR12  | MTMR12:NM_001294344:exon14:c.C1771T:p.R591C,MTMR12:NM_001294343:exon15:c.C1939T:p.R647C,MTMR12:NM_001040446:exon16:c.C2101T:p.R701C | D         | D          | 0.0016       | 0.0018        | 0.0017         | 29.7        | D             |

**Table S2.**Comprehensive annotations of the MTMR12 and FAM134A variants.

**Chr**=chromosome,

**Pos**=position,

**REF**=reference allele,

**ALT**=alternative allele,

**AA change**=amino acid change,

**Polyphen2**=polyphen2 HDIV prediction identifying human damaging mutations by assuming differences between human proteins and their closely related mammalian homologs as non-damaging

**ExAc overall**=ExAC allele frequency

**gnomAD \_exome**=gnomAD minor allele frequency data based on whole-exome sequencing

**gnomAD \_genome**=gnomAD minor allele frequency data based on whole-genome sequencing

**CADD\_ phred**= CADD (Combined Annotation Dependent Depletion scores, version 1.6) phred-like rank score based on whole genom CADD raw scores

**MetaSVM \_pred**=MetaSVM predictions

**D**=damaging

**T**=tolerated

| Category                                  | 3 siblings<br>(IDT; N=3) | 30 additional ATD<br>patients (IDT;N=30) | 50 Controls<br>(IDT; N=50) |
|-------------------------------------------|--------------------------|------------------------------------------|----------------------------|
| Read length (bp)                          | 151                      | 151                                      | 151                        |
| # of reads per sample (M)                 | 870.7                    | 53.5                                     | 42.4                       |
| Median coverage at each targeted base (X) | 230                      | 51.1                                     | 38.6                       |
| Mean coverage at each targeted base (X)   | 259.5                    | 51.1                                     | 49.8                       |
| % of all reads that map to target         | 25.37%                   | 62.06%                                   | 55.1%                      |
| % of all bases that map to target         | 30.81%                   | 52.89%                                   | 46.76%                     |
| % of targeted bases read at least 8x      | 98.80%                   | 95.33%                                   | 95.02%                     |
| % of targeted bases read at least 10x     | 98.70%                   | 94.06%                                   | 93.35%                     |
| % of targeted bases read at least 815     | 98.57%                   | 83.89%                                   | 79.32%                     |
| % Mean error rate                         | 0.73%                    | 0.39%                                    | 0.92%                      |

**Table S3.** Summary sequencing statistics for index and protected subjects, cohort of 30 ATC patients with liver transplants and cohort of 50 control ATD patients.
